# Supplementary material for: Cross-reactive antibodies after SARS-CoV-2 infection and vaccination
Source: eLife. 2021 Nov 23;10:e70330. doi: 10.7554/eLife.70330 (PMC8610423; doi:10.7554/eLife.70330)
Supplement: Figure 1—source data 1. [file elife-70330-fig1-data1.xlsx]

## Sheet: Fig 1a
Figure 1a
Serum sample	Luminex MFI (IgG binding to SARS-CoV-2 Spike)	Age	Sex 1= female; 2 = male	Admission 1= yes; 2= no		Serum sample	Luminex MFI (IgG binding to SARS-CoV-2 Spike)
CP-1	6182.5	47	2	2		HD1	6
CP-2	3194.5	44	1	2		HD2	18
CP-3	11340	69	2	1		HD3	4
CP-4	6391	39	2	2		HD4	9
CP-5	917.5	28	1	2		HD5	15
CP-6	6433	50	2	1		HD6	6.5
CP-7	551	28	1	2		HD7	5
CP-8	2355.5	27	2	1		HD8	2.5
CP-9	1390	41	2	2		HD9	4
CP-10	12105.5	52	2	2		HD10	7
CP-11	1974	44	2	2		HD11	6
CP-12	3656.5	22	1	2		HD12	4
CP-13	4256	38	1	2		HD13	12
CP-14	303	29	1	2		HD14	10
CP-15	1693	73	2	2		HD15	4
CP-16	165	31	2	2		HD16	17
CP-17	3451	55	1	2		HD17	3
CP-18	9551	22	1	2		HD18	7
CP-19	610.5	25	2	2		HD19	26
CP-20	3365	55	1	2		HD20	3
CP-21	6335	23	1	2		HD21	5
CP-22	4981	24	2	2		HD22	10
CP-23	2908	68	2	2		HD23	10.5
CP-24	3058	62	2	2		HD24	12
CP-25	12588	44	1	2		HD25	6
CP-26	13501	48	2	1		HD26	10
CP-27	18804.5	63	1	1		HD27	7
CP-28	16814	75	2	1		HD28	7
CP-29	22285	75	1	1		HD29	5
CP-30	15993	56	1	1		HD30	8
CP-31	27515	70	2	1
CP-32	7372.5	74	2	1
CP-33	39779	56	1	1
CP-34	6493	59	1	1
CP-35	11161.5	50	2	1
CP-36	6055	74	2	1
CP-37	10684	62	1	2
CP-38	26519	65	2	1
CP-39	13201.5	64	1	1
CP-40	8291.5	46	1	1
CP-41	7634	64	2	1
CP-42	3363	56	1	1
CP-43	14297.5	73	2	1
CP-44	9545.5	57	2	1
CP-45	14662	57	2	1
CP-46	8792	26	1	1
CP-47	673	30	2	2
CP-48	16796	65	1	1
CP-49	8112.5	54	1	2
CP-50	17579	68	2	1

## Sheet: Fig 1b
Figure 1b
Serum sample	SARS-CoV-2 neutralization ID50	Luminex MFI (IgG binding to SARS-CoV-2 Spike)	Admission 1= yes; 2= no
CP-1	2612.16	6182.5	2
CP-2	1412.54	3194.5	2
CP-3	7413.1	11340	1
CP-4	3357.38	6391	2
CP-5	141.906	917.5	2
CP-6	635.331	6433	1
CP-7	174.985	551	2
CP-8	3589.22	2355.5	1
CP-9	794.328	1390	2
CP-10	13740.4	12105.5	2
CP-11	1721.87	1974	2
CP-12	263.027	3656.5	2
CP-13	1339.68	4256	2
CP-14	106.905	303	2
CP-15	542.001	1693	2
CP-16	100	165	2
CP-17	562.341	3451	2
CP-18	431.519	9551	2
CP-19	88.9201	610.5	2
CP-20	521.195	3365	2
CP-21	1051.96	6335	2
CP-22	1548.82	4981	2
CP-23	1235.95	2908	2
CP-24	1009.25	3058	2
CP-25	885.116	12588	2
CP-26	2958.01	13501	1
CP-27	7328.25	18804.5	1
CP-28	8729.71	16814	1
CP-29	1513.56	22285	1
CP-30	8770.01	15993	1
CP-31	5520.77	27515	1
CP-32	3006.08	7372.5	1
CP-33	8241.38	39779	1
CP-34	8433.35	6493	1
CP-35	8356.03	11161.5	1
CP-36	2128.14	6055	1
CP-37	1733.8	10684	2
CP-38	3026.91	26519	1
CP-39	6698.85	13201.5	1
CP-40	1566.75	8291.5	1
CP-41	1710.02	7634	1
CP-42	3767.04	3363	1
CP-43	20044.7	14297.5	1
CP-44	2648.5	9545.5	1
CP-45	5105.05	14662	1
CP-46	1059.25	8792	1
CP-47	100	673	2
CP-48	3999.45	16796	1
CP-49	1995.26	8112.5	2
CP-50	24322	17579	1

## Sheet: Fig 1c
Figure 1c
Serum sample	Scores		Admission 1= yes; 2= no		Explained variance (%)				Loadings			Input data
	PC 1	PC 2			PC1	PC2			PC1	PC2		Sample	SARS 2 S	RBD	N	Age	DSSO	Neutralization
CP-1	0.291742	-1.12204	2		63.9254	16.5866		SARS 2 S	0.482063	0.0514797		CP-1	6182.5	7669.5	14019.5	47	26	2612.16
CP-2	-0.646041	2.97629	2					RBD	0.467488	0.00116465		CP-2	3194.5	6074.5	2598	44	64	1412.54
CP-3	1.7689	-0.113368	1					N	0.451317	-0.0817483		CP-3	11340	13195.5	17759.5	69	37	7413.1
CP-4	-0.0481511	-0.761694	2					Age	0.360122	-0.0417436		CP-4	6391	7354.5	6900.5	39	29	3357.38
CP-5	-2.99259	0.52539	2					DSSO	0.0838453	0.986814		CP-5	917.5	1137	4338	28	39	141.906
CP-6	-0.261439	-0.322089	1					Neutralization	0.4568	-0.122972		CP-6	6433	9548.5	5917.5	50	32	635.331
CP-7	-3.82579	-0.317574	2									CP-7	551	1470.5	641.5	28	30	174.985
CP-8	-0.957242	-0.786628	1									CP-8	2355.5	3709	7444.5	27	29	3589.22
CP-9	-2.60031	0.778748	2									CP-9	1390	1009.5	948.5	41	42	794.328
CP-10	1.93326	-0.380646	2									CP-10	12105.5	14423.5	37194.5	52	35	13740.4
CP-11	-0.663919	-0.817711	2									CP-11	1974	3614	14275.5	44	29	1721.87
CP-12	-2.42279	-0.632988	2									CP-12	3656.5	2948.5	1646.5	22	27	263.027
CP-13	-0.393031	-0.810397	2									CP-13	4256	9045	7919	38	28	1339.68
CP-14	-4.99883	-0.14664	2									CP-14	303	465.5	294.5	29	31	106.905
CP-15	-1.11746	-0.196749	2									CP-15	1693	2092.5	4455.5	73	34	542.001
CP-16	-5.25584	-0.0352047	2									CP-16	165	633	184.5	31	32	100
CP-17	-1.33848	-0.102978	2									CP-17	3451	2030	3254	55	34	562.341
CP-18	-0.41697	0.875804	2									CP-18	9551	8569.5	15197.5	22	43	431.519
CP-19	-2.94386	-0.33876	2									CP-19	610.5	5836.5	2463.5	25	30	88.9201
CP-20	-0.842313	-0.986828	2									CP-20	3365	3813.5	7582.5	55	26	521.195
CP-21	-0.665131	0.088513	2									CP-21	6335	6517	8813.5	23	36	1051.96
CP-22	-1.26259	-0.466333	2									CP-22	4981	7151.5	1671.5	24	30	1548.82
CP-23	-0.10907	-0.0822141	2									CP-23	2908	4066.5	10364	68	36	1235.95
CP-24	-0.218041	-0.786709	2									CP-24	3058	4680	12254	62	29	1009.25
CP-25	0.583009	0.0483587	2									CP-25	12588	15907.5	14272.5	44	36	885.116
CP-26	0.965014	0.0163126	1									CP-26	13501	8807.5	20206	48	37	2958.01
CP-27	2.12118	-1.23838	1									CP-27	18804.5	24225.5	23740.5	63	26	7328.25
CP-28	2.43063	-1.08777	1									CP-28	16814	23263.5	26469	75	28	8729.71
CP-29	1.93473	2.22926	1									CP-29	22285	17921.5	15850.5	75	58	1513.56
CP-30	1.59423	0.596257	1									CP-30	15993	18616.5	8233.5	56	43	8770.01
CP-31	1.71389	-1.34316	1									CP-31	27515	16887	7453.5	70	24	5520.77
CP-32	1.48784	-0.423528	1									CP-32	7372.5	9433.5	34169.5	74	34	3006.08
CP-33	2.81285	0.553185	1									CP-33	39779	44420.5	29649.5	56	43	8241.38
CP-34	1.236	-0.542892	1									CP-34	6493	10079.5	18634.5	59	33	8433.35
CP-35	1.47123	-0.273512	1									CP-35	11161.5	18809	15117.5	50	35	8356.03
CP-36	0.254499	0.186198	1									CP-36	6055	7119.5	2802.5	74	38	2128.14
CP-37	1.20307	-0.294977	2									CP-37	10684	14572.5	20659.5	62	34	1733.8
CP-38	2.25967	0.846353	1									CP-38	26519	38244.5	16983.5	65	45	3026.91
CP-39	2.05663	1.35743	1									CP-39	13201.5	19554.5	21283.5	64	51	6698.85
CP-40	0.394307	0.628397	1									CP-40	8291.5	11572.5	9406	46	42	1566.75
CP-41	0.945182	-0.124204	1									CP-41	7634	7736	26895	64	36	1710.02
CP-42	-0.232014	-0.26945	1									CP-42	3363	6111.5	3235.5	56	34	3767.04
CP-43	2.28965	-0.602732	1									CP-43	14297.5	17492	14928.5	73	33	20044.7
CP-44	0.310489	0.385544	1									CP-44	9545.5	5273.5	5866.5	57	40	2648.5
CP-45	1.63431	3.52047	1									CP-45	14662	12802.5	12072	57	71	5105.05
CP-46	0.203648	0.262029	1									CP-46	8792	17036	16053	26	38	1059.25
CP-47	-3.60393	0.89453	2									CP-47	673	737.5	2239.5	30	42	100
CP-48	0.687465	-0.184162	1									CP-48	16796	3278.5	7621.5	65	35	3999.45
CP-49	0.600927	0.702157	2									CP-49	8112.5	12140.5	7953.5	54	43	1995.26
CP-50	2.6315	-1.87891	1									CP-50	17579	28924	24416.5	68	21	24322
