# Supplementary material for: Cross-reactive antibodies after SARS-CoV-2 infection and vaccination
Source: eLife. 2021 Nov 23;10:e70330. doi: 10.7554/eLife.70330 (PMC8610423; doi:10.7554/eLife.70330)
Supplement: Figure 2—source data 1. [file elife-70330-fig2-data1.xlsx]

## Sheet: Fig 2a 
Figure 2a	Luminex MFI (IgG binding to indicated antigen)								Luminex MFI (IgG binding to indicated antigen)
Serum sample	SARS-CoV Spike	MERS-CoV Spike	hCoV-OC43 Spike	hCoV-HKU1 Spike	hCoV-229E Spike	hCoV-NL63 Spike			SARS-CoV Spike	MERS-CoV Spike	hCoV-OC43 Spike	hCoV-HKU1 Spike	hCoV-229E Spike	hCoV-NL63 Spike
CP-1	310	184	31333	4076	1730.5	363.5		HD1	4	6	524.5	41.5	189.5	399.5
CP-2	112	41	2213	313	541	338.5		HD2	5	11	940.5	679.5	2731	1347.5
CP-3	958	89	1602.5	410	947	166.5		HD3	1	2	216.5	41	51.5	72
CP-4	371	335	1607	825	127.5	254.5		HD4	4	17.5	2134.5	427	141.5	287.5
CP-5	99	26	1194.5	150	300.5	163.5		HD5	5.5	18	2250.5	471	154.5	318.5
CP-6	363.5	116.5	725.5	108.5	940	259.5		HD6	6	12	125.5	281	30.5	112.5
CP-7	20	23	786.5	1325.5	108.5	104.5		HD7	3	5	187.5	38	105.5	131.5
CP-8	115.5	41	284	2046	143.5	297.5		HD8	1	5	71.5	169.5	56	91.5
CP-9	126	172.5	1089.5	135	417.5	227.5		HD9	2	8	469	296	88	79.5
CP-10	495	83	1174.5	3713.5	601.5	385		HD10	1	8	310.5	191	287	245
CP-11	43	21	479.5	794	283.5	177.5		HD11	3.5	11	212.5	333	48.5	48.5
CP-12	579	178	890.5	1050	754.5	483.5		HD12	4	7	1539.5	208	179.5	248.5
CP-13	148	24	2573.5	561	262.5	298.5		HD13	4	10	416	370.5	281	338.5
CP-14	27	14	105.5	228	174	306.5		HD14	6	6	464.5	153	466.5	52.5
CP-15	107	35	781.5	583	656.5	111.5		HD15	2	6	518.5	329	95.5	86.5
CP-16	11	6	1155.5	167	57.5	237.5		HD16	3	7	98.5	115	52	186.5
CP-17	274.5	20	2578.5	876	527	427		HD17	2	6	141.5	237	504.5	213.5
CP-18	1132.5	493	3665	439	384.5	1070.5		HD18	5	5	2542.5	139	279.5	445.5
CP-19	21	31	1030.5	939	716.5	167.5		HD19	6	7	750.5	149	59	124.5
CP-20	383	59	2702.5	899	1938.5	329.5		HD20	1	4	308.5	88	198.5	208.5
CP-21	572	142	2473	833.5	739.5	1483.5		HD21	2	5	224	157	70.5	65.5
CP-22	255	66	1032	273	81.5	623.5		HD22	3	8	422	449	495.5	118.5
CP-23	182.5	58	5470.5	2663.5	4215.5	819.5		HD23	4	9	1713.5	245	119.5	110.5
CP-24	238	134	2617	4411	2219.5	599.5		HD24	4.5	5	786.5	154	126.5	146.5
CP-25	1183	702	3503.5	910.5	1369.5	995		HD25	4	6	374.5	131	190.5	139.5
CP-26	2275	529.5	4916	873	3317.5	608		HD26	4	8	965.5	83	76.5	444.5
CP-27	1359	299	2340.5	1888.5	4093	1947.5		HD27	3	14	252	930	167	564
CP-28	628	78.5	1201	1688.5	3848	253.5		HD28	3	6	212.5	201	332.5	227.5
CP-29	6066	338.5	4099	545	2186.5	453.5		HD29	1	5	557	140	389	112.5
CP-30	475.5	79	1105.5	129	593.5	241.5		HD30	3	24	2255.5	1505.5	214.5	579.5
CP-31	998.5	708	3958.5	989	877.5	450
CP-32	143.5	35	1059.5	1642.5	4852.5	299.5
CP-33	1475	205	2056	1598	760.5	256.5
CP-34	299.5	168	3808.5	3278.5	1707.5	560.5
CP-35	850.5	398	2543.5	1063	633	222.5
CP-36	417	75	1464.5	948.5	2379.5	383.5
CP-37	658	235.5	620.5	933	561.5	98.5
CP-38	1227	85.5	4346.5	1252	2844.5	963.5
CP-39	466	44	1834.5	469	3107.5	173.5
CP-40	571	37	490.5	69	399	52.5
CP-41	724	62.5	1498.5	523.5	490.5	535
CP-42	71	15	629	655	522.5	133.5
CP-43	1165	155	2587.5	2132	3022.5	211.5
CP-44	1280.5	1097.5	1880.5	838	158.5	49.5
CP-45	1261	34	2729	396	220.5	197.5
CP-46	203	111	3352.5	457	576.5	763
CP-47	60	40	1886.5	418	327	271.5
CP-48	4204.5	525.5	2148.5	1173	2603	306.5
CP-49	222.5	23	766	71	179.5	837.5
CP-50	1164	47	2748.5	237	428.5	126.5

## Sheet: Fig 2b
Figure 2b	Depletion (decrease of IgG binding to indicated antigen)
Serum sample	SARS-CoV-2 Spike	SARS-CoV Spike	MERS-CoV Spike	hCoV-OC43 Spike	hCoV-HKU1 Spike	hCoV-229E Spike	hCoV-NL63 Spike
CP-1	93	45	15	-2	-9	-1	-5
CP-2	94	35	11	1	-4	3	-3
CP-3	91	73	11	23	2	49	-4
CP-4	97	67	60	38	9	-1	-4
CP-5	85	39	3	-1	-2	1	0
CP-6	96	66	37	21	4	-4	-4
CP-7	80	16	0	11	4	2	5
CP-8	94	33	6	2	-8	2	-4
CP-9	89	53	44	23	8	-6	-7
CP-10	94	51	10	3	-2	20	0
CP-11	93	16	0	-3	-5	-2	-4
CP-12	95	79	38	28	2	33	-3
CP-13	96	54	3	1	3	1	1
CP-14	68	13	0	3	-5	-8	-6
CP-15	94	49	11	2	-4	-3	-2
CP-16	62	4	-7	-3	0	-2	-5
CP-17	89	49	-3	11	0	-7	-3
CP-18	95	76	48	14	3	6	-1
CP-19	73	7	3	-8	-9	-11	-7
CP-20	94	61	12	-7	-8	7	-7
CP-21	93	62	11	-4	-10	-18	-18
CP-22	94	46	6	5	-4	-8	-11
CP-23	89	33	0	-8	-6	-6	-5
CP-24	89	35	0	-6	-7	-6	-5
CP-25	96	70	52	31	8	2	-7
CP-26	97	93	70	18	15	25	-10
CP-27	92	92	55	8	-4	-5	-10
CP-28	93	81	17	-2	-3	-6	-4
CP-29	98	97	60	36	28	67	6
CP-30	96	65	20	1	-2	-10	-6
CP-31	97	85	58	32	1	-6	-12
CP-32	97	53	5	22	-3	-5	-4
CP-33	98	89	52	25	3	23	10
CP-34	94	57	32	4	0	1	5
CP-35	95	81	58	25	8	18	4
CP-36	95	63	20	2	1	7	3
CP-37	97	83	50	44	5	4	4
CP-38	98	89	26	1	2	-1	-1
CP-39	96	76	20	5	2	0	-1
CP-40	97	84	14	-2	-2	0	1
CP-41	97	79	20	1	-5	13	-4
CP-42	96	63	6	7	6	10	3
CP-43	95	77	28	25	3	7	6
CP-44	96	92	86	72	24	4	2
CP-45	93	81	24	37	34	7	1
CP-46	96	47	29	-5	3	-1	-3
CP-47	87	40	18	2	-1	3	0
CP-48	98	96	60	71	16	70	-1
CP-49	96	66	17	2	7	9	0
CP-50	94	83	13	39	8	2	4
