# Supplementary material for: Cross-reactive antibodies after SARS-CoV-2 infection and vaccination
Source: eLife. 2021 Nov 23;10:e70330. doi: 10.7554/eLife.70330 (PMC8610423; doi:10.7554/eLife.70330)
Supplement: Figure 3—source data 1. [file elife-70330-fig3-data1.xlsx]

## Sheet: Fig 3
Figure 3	% Depletion (decrease of IgG binding to indicated antigen after depletion with indicated SARS-CoV-2 domain)
Serum sample	SARS-CoV Spike		MERS-CoV Spike		hCoV-OC43 Spike		hCoV-HKU1 Spike		hCoV-229E Spike		hCoV-NL63 Spike
	S1	S2	S1	S2	S1	S2	S1	S2	S1	S2	S1	S2
CP-1	-0.0598291	0.264957	-0.0740741	0.185185	-0.0445029	-0.0329547	-0.121072	-0.0591497	-0.0938967	-0.0516432	-0.0617284	-0.0493827
CP-2	0.0869565	0.23913	0.0833333	0.0833333	-0.08742	0.0362473	-0.0632911	-0.0126582	-0.0300752	-0.0150376	-0.0685714	-0.0742857
CP-3	-0.165698	0.773256	-0.0789474	0.105263	-0.144509	0.356936	-0.0288462	0.163462	0.236486	0.0641892	-0.0701754	-0.0175439
CP-4	-0.0549451	0.571429	-0.0361446	0.590361	-0.0877016	0.5	-0.0397727	0.215909	-0.130841	0.0280374	-0.0833333	0
CP-5	-0.0454545	0.340909	0	0.0606061	-0.169139	0.0118694	-0.0638298	0.0159574	-0.170732	0	-0.0416667	-0.0138889
CP-6	0	0.494505	-0.0408163	0.265306	-0.169565	0.334783	-0.0616438	0.0273973	-0.115294	-0.0423529	-0.0879121	-0.0769231
CP-7	0.016129	0.129032	-0.0625	-0.0625	-0.123077	0.155769	-0.133562	-0.0342466	-0.09375	0	-0.05	0.0166667
CP-8	0.16	0.12	0.0571429	0.0142857	-0.0375	0.3	-0.0568032	-0.00924703	0	0	-0.0240964	-0.0120482
CP-9	0.0350877	0.508772	-0.0454545	0.469697	-0.0725327	0.32937	0.056338	0.197183	-0.0733333	0	-0.0761421	-0.035533
CP-10	0.056872	0.445498	0.025	0.05	-0.134199	0.0367965	-0.0733496	-0.0831296	-0.08	0.23	-0.107143	-0.0357143
CP-11	0.027027	0.135135	-0.0606061	-0.030303	-0.14094	0.00671141	-0.160271	-0.0541761	-0.0918367	-0.0714286	-0.0779221	-0.0649351
CP-12	-0.139535	0.775194	-0.106796	0.398058	-0.149798	0.234818	-0.0925373	-0.0358209	-0.163265	0.278912	-0.0804196	-0.13986
CP-13	0.0307692	0	0.0294118	-0.0882353	-0.0853659	-0.218902	-0.0591716	-0.186391	-0.103774	-0.179245	-0.0458716	-0.229358
CP-14	0	0.1	-0.0689655	-0.0344828	-0.12069	-0.0344828	-0.164557	-0.158228	-0.138462	-0.169231	-0.11	-0.21
CP-15	-0.0377358	0.415094	0.0405405	0.0810811	-0.149466	-0.0427046	-0.105978	-0.125	-0.130303	-0.115152	-0.0338983	-0.101695
CP-16	0	0.0357143	0	-0.0178571	-0.0857143	-0.0233766	-0.08	0.0133333	-0.0681818	-0.0227273	-0.12381	-0.0952381
CP-17	-0.0533333	0.633333	0	-0.0322581	-0.0499343	0.289093	-0.0447059	0.115294	-0.0555556	0.0163399	-0.0331126	0.0496689
CP-18	-0.145161	0.733871	-0.177419	0.491935	-0.255149	0.146453	-0.166667	0.0416667	-0.118421	0.0394737	-0.197368	-0.0723684
CP-19	-0.0178571	0.0714286	0	-0.030303	-0.286486	-0.0756757	-0.238342	-0.0777202	-0.259615	-0.125	-0.130435	-0.076087
CP-20	-0.057971	0.514493	0	0.0588235	-0.319809	-0.0883055	-0.239669	-0.0826446	-0.290168	0.0455635	-0.220588	-0.132353
CP-21	-0.269663	0.640449	-0.21519	0.126582	-0.439124	0.0697674	-0.308824	-0.0294118	-0.351351	-0.148649	-0.344749	-0.150685
CP-22	-0.0877193	0.333333	-0.0882353	0.0294118	-0.264706	0.0352941	-0.175573	-0.0687023	-0.153846	-0.0512821	-0.26	-0.16
CP-23	-0.119048	0.261905	-0.0909091	-0.030303	-0.293601	-0.0558344	-0.24507	-0.0507042	-0.268519	-0.0625	-0.150794	-0.0952381
CP-24	-0.0217391	0.347826	-0.1	0.075	-0.225	-0.01875	-0.255924	-0.0450237	-0.256696	-0.0401786	-0.169591	-0.0526316
CP-25	-0.0157068	0.591623	-0.0703125	0.515625	-0.239884	0.401734	-0.0926829	0.2	-0.140625	0.0859375	-0.165217	-0.0173913
CP-26	-0.461762	0.916747	-0.280543	0.692308	-0.459699	0.124889	-0.344173	0.0894309	-0.577528	0.170787	-0.442359	-0.182306
CP-27	-0.0514905	0.668022	-0.144578	0.457831	-0.333547	0.496159	-0.277356	-0.0855905	-0.268951	-0.0581516	-0.289377	-0.201465
CP-28	0.233607	0.315574	0.0283019	0.0188679	-0.297741	0.371663	-0.272819	-0.0892495	-0.293538	-0.0777656	-0.239316	-0.042735
CP-29	-0.0726703	0.956683	-0.0731707	0.54878	-0.118824	0.299306	-0.12	0.213333	-0.104137	0.663338	-0.0677966	-0.0451977
CP-30	0.164021	0.174603	-0.0888889	-0.0444444	-0.506203	-0.0186104	-0.273973	0.0684932	-0.504808	-0.0985577	-0.401869	-0.17757
CP-31	-0.247012	0.589641	-0.405099	0.507082	-0.502652	0.376515	-0.5625	-0.028125	-0.536481	-0.0944206	-0.522989	-0.241379
CP-32	-0.0147059	0.352941	0.025641	-0.0512821	-0.230263	0.335526	-0.243038	0.00253165	-0.297044	-0.0502112	-0.253968	-0.0555556
CP-33	-0.155319	0.645745	0.133333	0.179487	-0.442916	0.29436	-0.362069	0.0387931	-0.406699	0.311005	-0.299065	0.102804
CP-34	-0.0310078	0.542636	-0.176471	0.423529	-0.398075	0.107612	-0.395363	-0.0914787	-0.410138	-0.0518433	-0.380723	0.0313253
CP-35	0.0561404	0.757895	-0.0204082	0.622449	0.0431856	0.304543	0.0683453	0.147482	-0.00928793	0.164087	0.0319149	0
CP-36	-0.00775194	0.678295	0.0487805	0.097561	-0.0596026	0.0119205	0.0175824	0.021978	-0.0690033	-0.0788609	-0.0258621	-0.103448
CP-37	0.0614525	0.731844	0.030303	0.484848	-0.0163043	0.451087	-0.0163934	0.0245902	0	0.00310559	0.02	0
CP-38	0.398844	0.49422	0.12766	0.106383	-0.0485505	0.180929	-0.0439024	0.0634146	-0.00206612	-0.00826446	-0.012945	-0.0161812
CP-39	0.201439	0.442446	0.075	0.1	-0.0976027	0.244863	-0.104167	0.0138889	-0.097171	-0.0344403	-0.0352941	-0.0235294
CP-40	0.285285	0.312312	0.0810811	0	-0.107266	-0.0207612	-0.04	0	-0.0660377	-0.0283019	-0.025	-0.05
CP-41	0.418079	0.355932	0.0243902	0.134146	-0.087108	0.114983	-0.0945946	0.101351	-0.0961538	0.0913462	-0.024024	-0.0510511
CP-42	0.191781	0.424658	0.0285714	-0.0285714	-0.0687831	0.0330688	-0.062963	0.0185185	-0.0309278	0.024055	-0.0652174	-0.026087
CP-43	0.0346821	0.748555	-0.0175439	0.280702	-0.162225	0.798378	-0.0787402	0.0446194	-0.0742768	0.133698	-0.0588235	0.129412
CP-44	-0.0780142	0.853428	0.0225806	0.751613	-0.0272893	0.684657	-0.0260223	0.182156	-0.0263158	-0.0263158	-0.0238095	0.0238095
CP-45	-0.0465686	0.877451	0.0875	0.15	-0.069176	0.553408	0.00657895	0.592105	-0.0238095	0.0654762	-0.0208333	-0.0833333
CP-46	0.0666667	0.346667	-0.0208333	0.270833	-0.112269	-0.0439815	-0.0227273	0.0454545	-0.0880503	0.00628931	-0.0723404	-0.110638
CP-47	-0.0638298	0.340426	-0.0526316	0.131579	-0.165531	-0.0415531	-0.122302	-0.0359712	-0.158879	-0.0280374	-0.105691	-0.101626
CP-48	-0.121925	0.962821	-0.24375	0.59375	-0.102473	0.738516	-0.115207	0.18894	-0.142395	0.710356	-0.0824742	0.00515464
CP-49	0.204969	0.378882	0.114286	0.0857143	-0.0224719	0.0292135	0.0555556	0.0925926	0.0140845	0.084507	-0.006	-0.014
CP-50	0.13617	0.704255	0.0526316	0.0263158	-0.0719926	0.214584	-0.0322581	0.107527	-0.0434783	0.0144928	-0.0363636	0.0181818
