# Supplementary material for: Cross-reactive antibodies after SARS-CoV-2 infection and vaccination
Source: eLife. 2021 Nov 23;10:e70330. doi: 10.7554/eLife.70330 (PMC8610423; doi:10.7554/eLife.70330)
Supplement: Figure 4—source data 1. [file elife-70330-fig4-data1.xlsx]

## Sheet: Fig 4a
Figure 4a	Luminex MFI (IgG binding to indicated antigen)
Serum sample	SARS-CoV-2 Spike		SARS-CoV Spike		MERS-CoV Spike		hCoV-OC43 Spike		hCoV-HKU1 Spike		hCoV-229E Spike		hCoV-NL63 Spike
	week 0	week 12	week 0	week 12	week 12	week 0	week 12	week 0	week 12	week 0	week 12	week 0	week 12	week 0
M-1	1	16343.5	2	1866	1693.75	10.75	6167.5	7.5	417.25	11.25	322.75	30.25	125.5	15.5
M-2	1	14417	1	1661.5	1838.75	30.75	6617.5	209.5	744.25	49.25	234.25	42.25	131.5	38
M-3	1	28422	2	4516	4154.75	50.75	9289.5	261.5	1515.25	33.25	425.25	55.25	225.5	53.5
M-4	1	41730	1	5185	6877.75	38.75	8307.5	67.5	947.25	16.25	426.75	24.25	85.5	14.5
M-5	2	46049	1	8872	8527.75	44.75	16987	1192	2233.25	141.75	1543.75	122.75	604.5	54.5
M-6	1	32878	1	5653	9173.75	10.75	13673	15.5	2514.25	16.25	2812.25	19.25	346.5	52.5

## Sheet: Fig 4b
Figure 4b	% Depletion (decrease of IgG binding to indicated domain of indicated antigen)
Serum sample	SARS-CoV-2 Spike	SARS-CoV Spike	MERS-CoV Spike	hCoV-OC43 Spike	hCoV-HKU1 Spike	hCoV-229E Spike	hCoV-NL63 Spike
M-1	100	95	98	100	87	84	57
M-2	100	97	96	99	91	94	81
M-3	100	86	98	100	96	96	84
M-4	100	93	98	99	91	88	73
M-5	100	69	96	98	93	94	92
M-6	100	91	99	100	97	97	70
