# Supplementary material for: Cross-reactive antibodies after SARS-CoV-2 infection and vaccination
Source: eLife. 2021 Nov 23;10:e70330. doi: 10.7554/eLife.70330 (PMC8610423; doi:10.7554/eLife.70330)
Supplement: Figure 5—source data 1. [file elife-70330-fig5-data1.xlsx]

## Sheet: Fig 5
Figure 5
Serum sample	SARS-CoV Spike			MERS-CoV Spike			hCoV-OC43 Spike			hCoV-HKU1 Spike			hCoV-229E Spike			hCoV-NL63 Spike
	baseline	1st vaccine	2nd vaccine	baseline	1st vaccine	2nd vaccine	baseline	1st vaccine	2nd vaccine	baseline	1st vaccine	2nd vaccine	baseline	1st vaccine	2nd vaccine	baseline	1st vaccine	2nd vaccine
S3-1	30	3	114	1.5	2.5	11.5	65.5	41	193.5	17.5	18.5	61.5	17.5	20.5	73.5	21.5	25	85
S3-2	36.5	2	437.5	34	2.5	84	129	57	348.5	59	50.5	186.5	147.5	140	505	42	39	135.5
S3-3	60	2	170	24.5	2.5	46	202.5	157	414.5	31	22.5	78.5	18.5	17	53.5	41	38	102.5
S3-4	15.5	1	349.5	11.5	1	53	106	59	347	132	106.5	407	117.5	68.5	427.5	72	62	234
S3-5	4.5	1	170	4.5	1.5	21	20	14	80.5	32	34.5	130	32	32	131	44	47	167
S3-6	15.5	3	34.5	13.5	2.5	17.5	51	26	77.5	111	70.5	158	36.5	27	55	43	31	56
S3-7	6.5	1	125.5	1.5	2	12.5	61	67.5	150	11	11.5	29.5	20.5	23	53.5	43	51	111.5
S3-8	11.5	1	184.5	3.5	1.5	28.5	48	37	145.5	16	12.5	39	25.5	20	97	42	42	94
S3-9	13	1	181	4.5	2.5	23	25.5	11	70.5	23.5	25.5	81	28.5	36	109.5	20	26	78.5
S3-10	7.5	1	387.5	2.5	1.5	39.5	117	99	329.5	37	32	115	53.5	50	161	27.5	26	76
S3-11	26.5	3	201.5	7.5	6.5	27	149	171	379	137	172.5	325	48.5	67	147.5	48.5	67	127
S3-12	374.5	3.5	871.5	91	3.5	135	298	67	663.5	97	65	209.5	191.5	119	424.5	60	52	141.5
S3-13	6	1	38.5	4.5	2.5	22	190.5	180	436	13	10	30.5	210.5	200	466.5	22	23	49
S3-14	28.5	1	260.5	9	2.5	28.5	147.5	47	398	76.5	71.5	185	48.5	51	127	29	32	72
S3-15	13.5	6	154	3.5	4.5	22.5	73	67	133.5	51	47	85	65.5	65	103.5	38	43	62
S3-16	33.5	1	113.5	55.5	2.5	69.5	134	51.5	280.5	31.5	25	92	139.5	114	470	45	41	146
S3-17	12.5	5	108.5	6.5	5.5	17	172	140	343.5	237	194.5	505.5	87	72	227	77	67	177.5
S3-18	8	1	133	8	1.5	24.5	117.5	76	304.5	78.5	70.5	189.5	78.5	68.5	207	22	21	61.5
S3-19	10.5	2	290.5	3.5	3.5	26	29	19	89.5	65	65.5	153.5	28.5	31.5	85.5	58	64	151.5
S3-20	3	4	46.5	5.5	3.5	12	134.5	122	215.5	37.5	45.5	74.5	69.5	83	150.5	36.5	47	76.5
S3-21	106.5	4	250.5	78	5.5	111	371	184	747.5	81	66.5	175.5	174.5	115.5	390.5	136	132	321
S3-22	12	2	155.25	3.5	1	16.5	78	51.5	236.5	76.5	63	222	20	13	64	92	78	270
S3-23	4	3.5	140.75	1.5	2	10.5	36.5	74.5	70.5	9.5	33	22	17.5	46	36	5.5	23	15
S3-24	16	3	83.25	8.5	2	12.5	101.5	36.5	146.5	131.5	73	189	70.5	42	131	79.5	46	121
S3-25	25	3	89.75	8.5	2	11.5	115.5	94	136.5	55.5	48	66	59.5	58	80.5	55	54	68
S3-26	9	2	471.25	4.5	1	21.5	41.5	44.5	108.5	48.5	46.5	106	37.5	34.5	610.5	27.5	28	62.5
S3-27	176	2	396.25	20.5	1	48.5	195	38.5	369.5	53.5	32	97.5	90.5	43	233	76.5	54	156
S3-28	47	1	157.25	24.5	2	28.5	83.5	25.5	125.5	10.5	6	15	30.5	30	74	86.5	91	195
S3-29	3.5	1	51.25	2.5	1	7.5	97.5	68.5	204.5	87.5	68	161	113.5	76	245	20.5	24	49
S3-30	37.5	5	43.25	11.5	4	6.5	60	36.5	52.5	25.5	27	27	22.5	25	30	39.5	40	51
S3-31	16	2	182.25	6.5	1	25	80.5	59.5	165.5	20.5	21	35	44.5	44	77	17.5	24	31
S3-32	59	2	24.5	60.5	2	21	231.5	73.5	98.5	336	293.5	178.5	12.5	12	5.5	52.5	52	29.5
S3-33	80	2	62.5	96	2	17	341	66.5	118.5	70.5	38	41.5	42.5	24	30.5	67.5	44	50.5
S3-34	24	3	200.5	1.5	1	11	81.5	19.5	267	4.5	12	14.5	6.5	13.5	19.5	5.5	12	17.5
S3-35	29	1	78	9.5	1	9	50.5	21.5	39.5	87.5	64	79.5	61	45	51.5	28.5	21	24.5
S3-36	3	2	66.5	2.5	1	8	29.5	24.5	50.5	18.5	16	23.5	13.5	13	24.5	23.5	18	26.5
S3-37	3	2	21.5	1.5	3	5	68.5	73.5	78.5	78.5	94	97.5	31.5	41.5	44.5	70.5	82	93.5
S3-38	6	3	47.5	2.5	3	6	137.5	98.5	126.5	60.5	49	54.5	32	24	35.5	42.5	35	37.5
S3-39	59	3	69.5	22.5	2	19	96.5	62.5	105.5	22.5	18	27.5	30.5	16	31.5	34.5	30	42.5
S3-40	5	1	100.5	2	1	12	17.5	24.5	44.5	151	211.5	243.5	48.5	72	91.5	56.5	84	100
S3-41	7	1	64.5	1.5	1	6	62.5	70.5	78.5	47.5	53	59.5	67.5	74	89.5	35.5	38	46.5
S3-42	3	3	52	2.5	3	13	83.5	123.5	233	9.5	24	28.5	44.5	73	139.5	31.5	53	97
S3-43	15	1	31.5	6.5	1	7	44.5	20.5	50	7.5	5	8.5	47.5	34	61.5	11.5	7	14.5
S3-44	80	1	121	321.5	1	213	634	10.5	515.5	119.5	45	198.5	33.5	18	74.5	24.5	14	56
S3-45	40	2	449.5	23.5	2	135	269.5	186.5	695.5	56.5	47	128.5	198.5	166	599.5	50.5	37	106.5
