# Supplementary material for: Cross-reactive antibodies after SARS-CoV-2 infection and vaccination
Source: eLife. 2021 Nov 23;10:e70330. doi: 10.7554/eLife.70330 (PMC8610423; doi:10.7554/eLife.70330)
Supplement: Source data 1. [file elife-70330-supp4.xlsx]

## Sheet: Source data for supplement figs
Fig. 1 - Figure Supplement 1a						Fig. 1 - Figure Supplement 1b						Fig. 2-Figure Supplement 1a						Fig. 2-Figure Supplement 1b				Fig. 2-Figure Supplement 1c				Fig. 2-Figure Supplement 1d									Fig. 2-Figure Supplement 2						Fig. 2-Figure Supplement 3
						Serum sample	Scores																				% Depletion (decrease of IgG binding to indicated antigen)																Luminex MFI (IgG binding to indicated antigen)
Serum sample	Age	Sex 1= female; 2 = male	Admission 1= yes; 2= no	Severity score			PC 1	PC 2	Sex 1= female; 2 = male	Severity score		Serum sample	Tetanus toxoid IgG binding (Luminex MFI)		Serum sample	Tetanus toxoid IgG binding (Luminex MFI)		Serum sample	% Depletion of Tetanus toxoid IgG binding (Luminex MFI)			Serum sample	% Depletion of Tetanus toxoid IgG binding (Luminex MFI)			Serum sample	SARS-CoV-2 Spike	SARS-CoV Spike	MERS-CoV Spike	hCoV-OC43 Spike	hCoV-HKU1 Spike	hCoV-229E Spike	hCoV-NL63 Spike		Antigen	Sequence identity (%)	S depletion (%)	S1 depletion (%)	S2 depletion (%)		Serum sample	SARS-CoV-2 neutralization ID50	SARS-CoV Spike	MERS-CoV Spike	hCoV-OC43 Spike	hCoV-HKU1 Spike	hCoV-229E Spike	hCoV-NL63 Spike	Tetanus toxoid
CP-1	47	2	2	2		CP-1	0.291742	-1.12204	2	2		CP-1	25463.5		HD1	2666.5		CP-1	-1.9			HD1	-0.4			HD1	-3.7	0	3.3	0.2	0	-1.1	0		SARS-CoV	75.4	61	0	48		CP-1	2612.16	310	184	31333	4076	1730.5	363.5	25463.5
CP-2	44	1	2	1		CP-2	-0.646041	2.97629	1	1		CP-2	267		HD2	5520.5		CP-2	-1.9			HD2	1			HD2	3.6	3.7	0	0.9	5	6	2.9		MERS-CoV	30.9	25	-3	20		CP-2	1412.54	112	41	2213	313	541	338.5	267
CP-3	69	2	1	1		CP-3	1.7689	-0.113368	2	1		CP-3	27.5		HD3	161		CP-3	-1.9			HD3	3.5			HD3	3.7	0	-3.6	0.5	-2.4	4.3	-5.8		hCoV-OC43	30	13	-17	19		CP-3	7413.1	958	89	1602.5	410	947	166.5	27.5
CP-4	39	2	2	3		CP-4	-0.0481511	-0.761694	2	3		CP-4	3226.5		HD4	2593.5		CP-4	1.2			HD4	-3.5			HD4	0	3.7	-1.5	-7.2	-0.7	-5.6	-8.1		hCoV-HKU1	30.3	2	-13	3		CP-4	3357.38	371	335	1607	825	127.5	254.5	3226.5
CP-5	28	1	2	1		CP-5	-2.99259	0.52539	1	1		CP-5	1656.5		HD5	2788		CP-5	-9.8			HD5	-13			HD5	0	0	0	-13.8	-12.7	-11	-10.1		hCoV-229E	27.4	6	-15	3		CP-5	141.906	99	26	1194.5	150	300.5	163.5	1656.5
CP-6	50	2	1	3		CP-6	-0.261439	-0.322089	2	3		CP-6	12667.5		HD6	18532.5		CP-6	-4.3			HD6	-11.7			HD6	6.9	0	3.2	-9.3	-10.3	-2.9	-7.8		hCoV-NL63	26.2	-2	-13	-6		CP-6	635.331	363.5	116.5	725.5	108.5	940	259.5	12667.5
CP-7	28	1	2	1		CP-7	-3.82579	-0.317574	1	1		CP-7	3056		HD7	4943.5		CP-7	4.1			HD7	-1			HD7	6.9	2	0	0	2.4	0	0.8								CP-7	174.985	20	23	786.5	1325.5	108.5	104.5	3056
CP-8	27	2	1	1		CP-8	-0.957242	-0.786628	2	1		CP-8	6022.5		HD8	2598.5		CP-8	-6.3			HD8	7.6			HD8	7.1	-4.2	0	1.8	3.2	2.1	1.8								CP-8	3589.22	115.5	41	284	2046	143.5	297.5	6022.5
CP-9	41	2	2	3		CP-9	-2.60031	0.778748	2	3		CP-9	5116		HD9	4439.5		CP-9	-9.4			HD9	2.6			HD9	10	3.7	0	-0.6	-3.9	5.8	0								CP-9	794.328	126	172.5	1089.5	135	417.5	227.5	5116
CP-10	52	2	2	2		CP-10	1.93326	-0.380646	2	2		CP-10	8323.5		HD10	1332.5		CP-10	1.9			HD10	-5.3			HD10	3.7	-4.2	0	-3.2	-2.8	-3.4	-3.2								CP-10	13740.4	495	83	1174.5	3713.5	601.5	385	8323.5
CP-11	44	2	2	2		CP-11	-0.663919	-0.817711	2	2		CP-11	3130.5		HD11	1758.5		CP-11	-4			HD11	0.2			HD11	13.3	3.8	0	-2.2	-1.7	5	0								CP-11	1721.87	43	21	479.5	794	283.5	177.5	3130.5
CP-12	22	1	2	2		CP-12	-2.42279	-0.632988	1	2		CP-12	822.5		HD12	5583.5		CP-12	2.6			HD12	-3			HD12	0	-3.8	0	-4.9	-4.2	-8.1	-2.1								CP-12	263.027	579	178	890.5	1050	754.5	483.5	822.5
CP-13	38	1	2	1		CP-13	-0.393031	-0.810397	1	1		CP-13	8096.5		HD13	4268.5		CP-13	1.7			HD13	9.7			HD13	0	3.7	-3.4	8.3	4.8	5.3	7.7								CP-13	1339.68	148	24	2573.5	561	262.5	298.5	8096.5
CP-14	29	1	2	2		CP-14	-4.99883	-0.14664	1	2		CP-14	17582		HD14	2258.5		CP-14	-9.1			HD14	4.9			HD14	3.6	-4.2	-7.4	-1.6	-2	-2.8	-5.6								CP-14	106.905	27	14	105.5	228	174	306.5	17582
CP-15	73	2	2	3		CP-15	-1.11746	-0.196749	2	3		CP-15	30.5		HD15	4960.5		CP-15	-1.6			HD15	-9.9			HD15	3.6	0	-3.4	-9.6	-7.6	-8.7	-6.4								CP-15	542.001	107	35	781.5	583	656.5	111.5	30.5
CP-16	31	2	2	1		CP-16	-5.25584	-0.0352047	2	1		CP-16	1896.5		HD16	5665		CP-16	-0.8			HD16	1.2			HD16	12.9	0	-3.6	-3.9	1.8	4.9	-2.7								CP-16	100	11	6	1155.5	167	57.5	237.5	1896.5
CP-17	55	1	2	2		CP-17	-1.33848	-0.102978	1	2		CP-17	3204		HD17	3734.5		CP-17	1.5			HD17	1.5			HD17	0	4	3.4	1.6	2.5	5.5	-1.3								CP-17	562.341	274.5	20	2578.5	876	527	427	3204
CP-18	22	1	2	3		CP-18	-0.41697	0.875804	1	3		CP-18	762.5		HD18	7748		CP-18	-8.2			HD18	10.4			HD18	7.1	-4.2	-3.6	9.5	7.8	10.9	4.9								CP-18	431.519	1132.5	493	3665	439	384.5	1070.5	762.5
CP-19	25	2	2	1		CP-19	-2.94386	-0.33876	2	1		CP-19	6508.5		HD19	860.5		CP-19	-9.4			HD19	0.7			HD19	12.9	7.7	-3.6	2.5	1.4	4.9	1.9								CP-19	88.9201	21	31	1030.5	939	716.5	167.5	6508.5
CP-20	55	1	2	1		CP-20	-0.842313	-0.986828	1	1		CP-20	9366		HD20	2667.5		CP-20	-9.9			HD20	7.4			HD20	7.4	-4.2	0	4.7	2	1.5	4.4								CP-20	521.195	383	59	2702.5	899	1938.5	329.5	9366
CP-21	23	1	2	2		CP-21	-0.665131	0.088513	1	2		CP-21	20189.5		HD21	4767.5		CP-21	-23.2			HD21	1.4			HD21	0	-2	0	-1.3	-4.9	-2.6	0								CP-21	1051.96	572	142	2473	833.5	739.5	1483.5	20189.5
CP-22	24	2	2	1		CP-22	-1.26259	-0.466333	2	1		CP-22	14081.5		HD22	956		CP-22	-11.8			HD22	5.4			HD22	7.1	-2	0	-1.6	0.9	1.1	-2.7								CP-22	1548.82	255	66	1032	273	81.5	623.5	14081.5
CP-23	68	2	2	3		CP-23	-0.10907	-0.0822141	2	3		CP-23	513		HD23	1332		CP-23	-4.9			HD23	7.4			HD23	7.1	2	-3.6	3.5	1.7	4.4	0								CP-23	1235.95	182.5	58	5470.5	2663.5	4215.5	819.5	513
CP-24	62	2	2	1		CP-24	-0.218041	-0.786709	2	1		CP-24	7275.5		HD24	13003.5		CP-24	-7.6			HD24	-1.1			HD24	-3.7	0	-3.4	-0.6	-8.4	3.6	-1.9								CP-24	1009.25	238	134	2617	4411	2219.5	599.5	7275.5
CP-25	44	1	2	3		CP-25	0.583009	0.0483587	1	3		CP-25	6200.5		HD25	4965		CP-25	-9.2			HD25	-2.3			HD25	0	0	3.4	0	3.1	1.4	1.6								CP-25	885.116	1183	702	3503.5	910.5	1369.5	995	6200.5
CP-26	48	2	1	3		CP-26	0.965014	0.0163126	2	3		CP-26	642.5		HD26	3871		CP-26	-6.9			HD26	-3			HD26	5.3	0	0	3.3	2	4.4	-3.8								CP-26	2958.01	2275	529.5	4916	873	3317.5	608	642.5
CP-27	63	1	1	2		CP-27	2.12118	-1.23838	1	2		CP-27	71.5		HD27	2278		CP-27	-2.7			HD27	-4.9			HD27	0	0	0	-2.3	-3.8	-5.3	-7.1								CP-27	7328.25	1359	299	2340.5	1888.5	4093	1947.5	71.5
CP-28	75	2	1	3		CP-28	2.43063	-1.08777	2	3		CP-28	5633.5		HD28	4253		CP-28	-6.1			HD28	-1.6			HD28	-1.8	-8.3	-3.6	-2.9	-6.3	-0.6	-2.8								CP-28	8729.71	628	78.5	1201	1688.5	3848	253.5	5633.5
CP-29	75	1	1	1		CP-29	1.93473	2.22926	1	1		CP-29	47.5		HD29	3785.5		CP-29	-1.6			HD29	4.1			HD29	7.1	0	0	1.4	7	3	4.1								CP-29	1513.56	6066	338.5	4099	545	2186.5	453.5	47.5
CP-30	56	1	1	1		CP-30	1.59423	0.596257	1	1		CP-30	5475.5		HD30	952		CP-30	-10.6			HD30	2.9			HD30	3.7	4	0	1.5	3.2	1.5	0.8								CP-30	8770.01	475.5	79	1105.5	129	593.5	241.5	5475.5
CP-31	70	2	1	2		CP-31	1.71389	-1.34316	2	2		CP-31	4226.5					CP-31	-12.8																						CP-31	5520.77	998.5	708	3958.5	989	877.5	450	4226.5
CP-32	74	2	1	2		CP-32	1.48784	-0.423528	2	2		CP-32	396.5					CP-32	-2.4																						CP-32	3006.08	143.5	35	1059.5	1642.5	4852.5	299.5	396.5
CP-33	56	1	1	4		CP-33	2.81285	0.553185	1	4		CP-33	2663.5					CP-33	-5.8																						CP-33	8241.38	1475	205	2056	1598	760.5	256.5	2663.5
CP-34	59	1	1	2		CP-34	1.236	-0.542892	1	2		CP-34	2480					CP-34	-1.2																						CP-34	8433.35	299.5	168	3808.5	3278.5	1707.5	560.5	2480
CP-35	50	2	1	3		CP-35	1.47123	-0.273512	2	3		CP-35	3265					CP-35	1.5																						CP-35	8356.03	850.5	398	2543.5	1063	633	222.5	3265
CP-36	74	2	1	3		CP-36	0.254499	0.186198	2	3		CP-36	140.5					CP-36	1.2																						CP-36	2128.14	417	75	1464.5	948.5	2379.5	383.5	140.5
CP-37	62	1	2	1		CP-37	1.20307	-0.294977	1	1		CP-37	19866.5					CP-37	5.3																						CP-37	1733.8	658	235.5	620.5	933	561.5	98.5	19866.5
CP-38	65	2	1	2		CP-38	2.25967	0.846353	2	2		CP-38	2989					CP-38	-1.9																						CP-38	3026.91	1227	85.5	4346.5	1252	2844.5	963.5	2989
CP-39	64	1	1	3		CP-39	2.05663	1.35743	1	3		CP-39	1310.5					CP-39	0.6																						CP-39	6698.85	466	44	1834.5	469	3107.5	173.5	1310.5
CP-40	46	1	1	4		CP-40	0.394307	0.628397	1	4		CP-40	7349.5					CP-40	-5.1																						CP-40	1566.75	571	37	490.5	69	399	52.5	7349.5
CP-41	64	2	1	2		CP-41	0.945182	-0.124204	2	2		CP-41	1562.5					CP-41	-4.8																						CP-41	1710.02	724	62.5	1498.5	523.5	490.5	535	1562.5
CP-42	56	1	1	1		CP-42	-0.232014	-0.26945	1	1		CP-42	2451.5					CP-42	8																						CP-42	3767.04	71	15	629	655	522.5	133.5	2451.5
CP-43	73	2	1	1		CP-43	2.28965	-0.602732	2	1		CP-43	1503.5					CP-43	-1.1																						CP-43	20044.7	1165	155	2587.5	2132	3022.5	211.5	1503.5
CP-44	57	2	1	2		CP-44	0.310489	0.385544	2	2		CP-44	307.5					CP-44	3.1																						CP-44	2648.5	1280.5	1097.5	1880.5	838	158.5	49.5	307.5
CP-45	57	2	1	3		CP-45	1.63431	3.52047	2	3		CP-45	3047.5					CP-45	0.2																						CP-45	5105.05	1261	34	2729	396	220.5	197.5	3047.5
CP-46	26	1	1	2		CP-46	0.203648	0.262029	1	2		CP-46	466.5					CP-46	-2.3																						CP-46	1059.25	203	111	3352.5	457	576.5	763	466.5
CP-47	30	2	2	1		CP-47	-3.60393	0.89453	2	1		CP-47	2325.5					CP-47	-0.7																						CP-47	100	60	40	1886.5	418	327	271.5	2325.5
CP-48	65	1	1	1		CP-48	0.687465	-0.184162	1	1		CP-48	30506.5					CP-48	-5.9																						CP-48	3999.45	4204.5	525.5	2148.5	1173	2603	306.5	30506.5
CP-49	54	1	2	2		CP-49	0.600927	0.702157	1	2		CP-49	4189.5					CP-49	0.4																						CP-49	1995.26	222.5	23	766	71	179.5	837.5	4189.5
CP-50	68	2	1	4		CP-50	2.6315	-1.87891	2	4		CP-50	5452.5					CP-50	2																						CP-50	24322	1164	47	2748.5	237	428.5	126.5	5452.5
						Explained variance (%)
						PC1	PC2
						63.9254	16.5866
						Input data:
						Found in the source data for Figure 1C
						And the source data for Figure 2A
