# Supplementary material for: Cross-reactive antibodies after SARS-CoV-2 infection and vaccination
Source: eLife. 2021 Nov 23;10:e70330. doi: 10.7554/eLife.70330 (PMC8610423; doi:10.7554/eLife.70330)
Supplement: Supplementary file 3. [file elife-70330-supp3.xlsx]

## Sheet: Statistical analysis overview
			Figure	Comparison		Test used	p value	CI 95%
			Fig 1a	IgG serum binding between groups of COVID-19 patients devided based on:	Convalescent COVID-19 patients vs Healthy donors	Mann-Whitney U test	<0,0001	4974 to 9545
					Hospitalization status	Mann-Whitney U test	<0,0001	5136 to 12111
					Male vs Female	Mann-Whitney U test	0.7139	-3070 to 4138
					Age group < 35 y/a vs 35-60 y/a	Mann-Whitney U test	0.0036	1611 to 7810
					Age group 35-60 y/a vs >60 y/a	Mann-Whitney U test	0.0833	-336,0 to 10007
					Age group <35 y/a vs >60 y/a	Mann-Whitney U test	0.0002	4349 to 15897
			Fig 1b	Neutralisation ID50 titers compared between groups of COVID-19 patients devided based on:	Hospitalization status	Mann-Whitney U test	<0,0001	1867 to 5821
			Fig 2a	IgG serum binding between COVID-19 patients and healthy donors against:	SARS-CoV S	Mann-Whitney U test	<0,0001	251 to 576
					MERS S	Mann-Whitney U test	<0,0001	39 to 127
					OC43 S	Mann-Whitney U test	<0,0001	662 to 1736
					HKU1 S	Mann-Whitney U test	<0,0001	287 to 750
					229E S	Mann-Whitney U test	<0,0001	275 to 678
					NL63 S	Mann-Whitney U test	0.0029	43 to 199
			Fig 4a	IgG binding measured at week 0 and week 12 after vaccination in macaques against:	SARS-CoV-2 S	Wilcoxon matched-pairs signed rank test	0.0313	14416 to 46047
					SARS-CoV S	Wilcoxon matched-pairs signed rank test	0.0313	1661 to 8871
					MERS S	Wilcoxon matched-pairs signed rank test	0.0313	1683 to 9163
					OC43 S	Wilcoxon matched-pairs signed rank test	0.0313	6160 to 15795
					HKU1 S	Wilcoxon matched-pairs signed rank test	0.0313	406 to 2498
					229E S	Wilcoxon matched-pairs signed rank test	0.0313	192 to 2793
					NL63 S	Wilcoxon matched-pairs signed rank test	0.0313	71 to 550
			Fig 5	IgG serum binding following one immunization of COVID-19 mRNA vaccination in humans compared to baseline binding against:	SARS-CoV S	Friedman test with Dunn's multiple comparisons test	<0,0001	NA
					MERS S	Friedman test with Dunn's multiple comparisons test	0.0003	NA
					OC43 S	Friedman test with Dunn's multiple comparisons test	0.0007	NA
					HKU1 S	Friedman test with Dunn's multiple comparisons test	0.164	NA
					229E S	Friedman test with Dunn's multiple comparisons test	0.1463	NA
					NL63 S	Friedman test with Dunn's multiple comparisons test	1	NA
					Tetanus toxoid	Friedman test with Dunn's multiple comparisons test	0.1834	NA
			Fig 5	IgG serum binding following two immunzations of COVID-19 mRNA vaccination in humans compared to one immunization binding against:	SARS-CoV S	Friedman test with Dunn's multiple comparisons test	<0,0001	NA
					MERS S	Friedman test with Dunn's multiple comparisons test	<0,0001	NA
					OC43 S	Friedman test with Dunn's multiple comparisons test	<0,0001	NA
					HKU1 S	Friedman test with Dunn's multiple comparisons test	<0,0001	NA
					229E S	Friedman test with Dunn's multiple comparisons test	<0,0001	NA
					NL63 S	Friedman test with Dunn's multiple comparisons test	<0,0001	NA
					Tetanus toxoid	Friedman test with Dunn's multiple comparisons test	<0,0001	NA
			Fig 2-Figure Supplement 1a	IgG serum binding between COVID-19 patients and healthy donors against:	Tetanus toxoid	Mann-Whitney U test	0.8473	-1496 to 1420
			Fig 4-Figure Supplement 1c	IgG binding measured at week 0 and week 12 after vaccination in macaques against:	Tetanus toxoid	Wilcoxon matched-pairs signed rank test	0.1563	-93 to 757
			Fig 5-Figure Supplement 1	IgG serum binding following one immunzation of COVID-19 mRNA vaccination in humans compared to one immunization binding against:	Tetanus toxoid	Friedman test with Dunn's multiple comparisons test	0.1834	NA
			Fig 5-Figure Supplement 1	IgG serum binding following two immunzations of COVID-19 mRNA vaccination in humans compared to one immunization binding against:	Tetanus toxoid	Friedman test with Dunn's multiple comparisons test	<0,0001	NA
